# Supplementary material for: Revisiting activity of some glucocorticoids as a potential inhibitor of SARS-CoV-2 main protease: theoretical study
Source: Royal Society of Chemistry journal article supplement (doi:10.1039/d0ra10674g), 2021-01-01

## Supplementary data

|                                                                                                                                                                                                                   |    |
|-------------------------------------------------------------------------------------------------------------------------------------------------------------------------------------------------------------------|----|
| Table 1SI: The RMSD of ligands fit to protein active during 100 ns and last 50 ns trajectories .....                                                                                                              | 2  |
| Figure 1: Snapshots of betamethasone contact with active site at 0, 50, 100ns.....                                                                                                                                | 3  |
| Figure 2: The histogram of Betamethasone-6LU7 contact over the course of the trajectory.....                                                                                                                      | 4  |
| Figure 3: The ligand property trajectory of the Betamethasone-6LU7 complex during the 100 ns simulation .....                                                                                                     | 4  |
| Figure 4: Betamethasone - 6LU7 Interaction shown by the active site amino acids in each trajectory frame, white refers to zero interaction while the deep color indicated more interactions.....                  | 5  |
| Figure 5: Snapshots of dexamethasone contact with active site at 0, 50, 100 ns. ....                                                                                                                              | 6  |
| Figure 6 The histogram of Dexamethasone-6LU7 contact over the course of the trajectory. ....                                                                                                                      | 7  |
| Figure 7: The ligand property trajectory of the dexamethasone-6LU7 complex during the 100 ns simulation .....                                                                                                     | 7  |
| Figure 8: Dexamethasone - 6LU7 Interaction shown by the active site amino acids in each trajectory frame, white refers to zero interaction while the deep color indicated more interactions.....                  | 8  |
| Figure 9: Snapshots of hydrocortisone contact with active site at 0, 50, 100ns.....                                                                                                                               | 9  |
| Figure 10: The histogram of hydrocortisone-6LU7 contact over the course of the trajectory.....                                                                                                                    | 10 |
| Figure 11: The ligand property trajectory of the hydrocortisone-6LU7 complex during the 100 ns simulation .....                                                                                                   | 10 |
| Figure 12: Hydrocortisone - 6LU7 Interaction shown by the active site amino acids in each trajectory frame, white refers to zero interaction while the deep color indicated more interactions.....                | 11 |
| Figure 13: Snapshots of triamcinolone contact with active site at 0, 50, 100ns.....                                                                                                                               | 12 |
| Figure 14: The histogram of triamcinolone-6LU7 contact over the course of the trajectory.....                                                                                                                     | 13 |
| Figure 15: The ligand property trajectory of the triamcinolone-6LU7 complex during the 100 ns simulation .....                                                                                                    | 13 |
| Figure 16: Triamcinolone - 6LU7 Interaction shown by the active site amino acids in each trajectory frame, white refers to zero interaction while the deep color indicated more interactions.....                 | 14 |
| Figure 17: Snapshots of fludrocortisone contact with active site at 0, 50, 100ns. ....                                                                                                                            | 15 |
| Figure 18: The histogram of fludrocortisone-6LU7 contact over the course of the trajectory. ....                                                                                                                  | 16 |
| Figure 19: The ligand property trajectory of the fludrocortisone-6LU7 complex during the 100 ns simulation. ....                                                                                                  | 16 |
| Figure 20: Fludrocortisone - 6LU7 Interaction shown by the active site amino acids in each trajectory frame, white refers to zero interaction while the deep color indicated more interactions.....               | 17 |
| Figure 21: Snapshots of ciclesonide contact with active site at 0, 50, 100ns. ....                                                                                                                                | 18 |
| Figure 22: The histogram of ciclesonide-6LU7 contact over the course of the trajectory. ....                                                                                                                      | 19 |
| Figure 23: The ligand property trajectory of the ciclesonide-6LU7 complex during the 100 ns simulation .....                                                                                                      | 19 |
| Figure 24: 3 D docking representations of Glucocorticosteroids and N3 inhibitor against the binding site of the Covid-19 main protease .....                                                                      | 20 |
| Figure 25: A) Surface of Mpro showing the positioning and fitting of the selected compounds, B) surface and maps of the selected compounds compared to N3 inhibitor .....                                         | 29 |
| Figure 26: 2 D diagram (a) and 3 D representation (b) of the superimposition of the co-crystallized (red) and the docking pose (green) of N3 in the Covid-19 main protease binding site with RMSD of 1.23 Å ..... | 33 |

Table 1SI: The RMSD of ligands fit to protein active during 100 ns and last 50 ns trajectories

| <b>Ligand</b>   | <b>100 ns<br/>Å</b> | <b>Last 50 ns<br/>Å</b> |
|-----------------|---------------------|-------------------------|
| Betamethasone   | 3.42                | 3.74                    |
| Dexamethasone   | 3.70                | 3.75                    |
| Hydrocortisone  | 6.97                | 7.70                    |
| Triamcinolone   | 4.45                | 4.43                    |
| Fludrocortisone | 5.25                | 5.10                    |
| Ciclesonide     | 3.88                | 4.68                    |

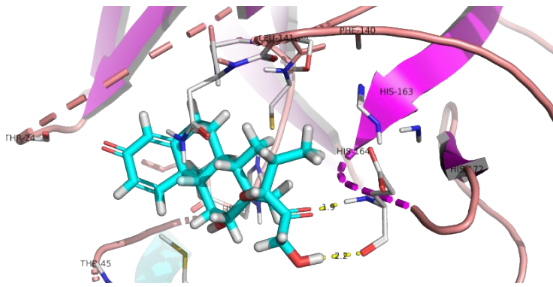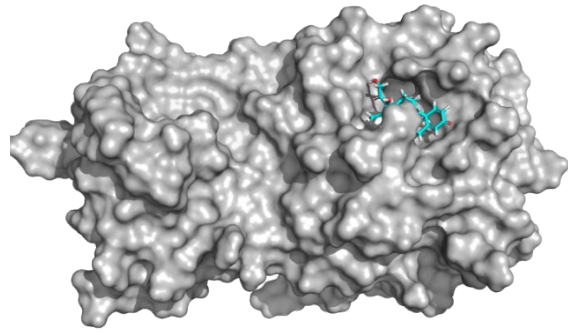

**0 ns**

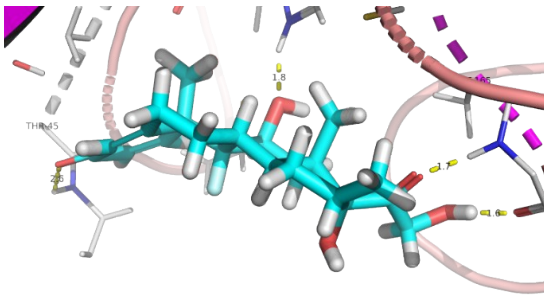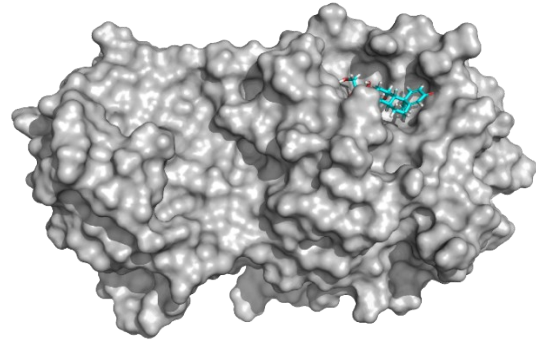

**50 ns**

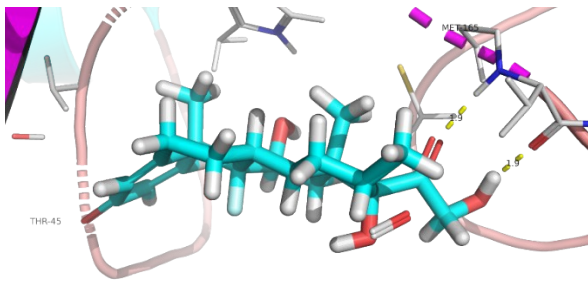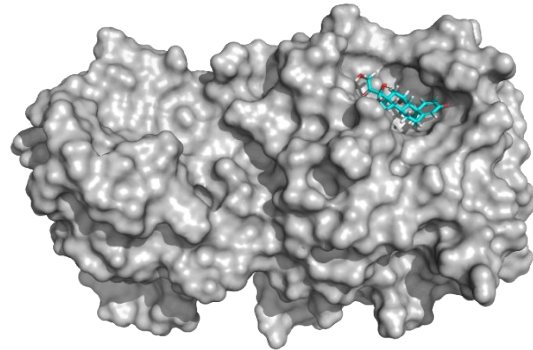

**100 ns**

Figure 1: Snapshots of betamethasone contact with active site at 0, 50, 100ns.

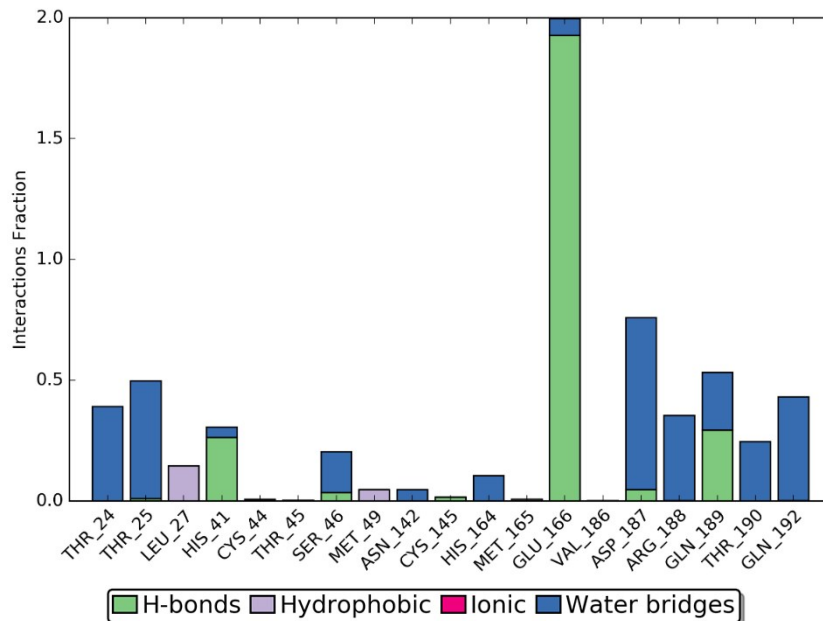

Figure 2: The histogram of Betamethasone-6LU7 contact over the course of the trajectory.

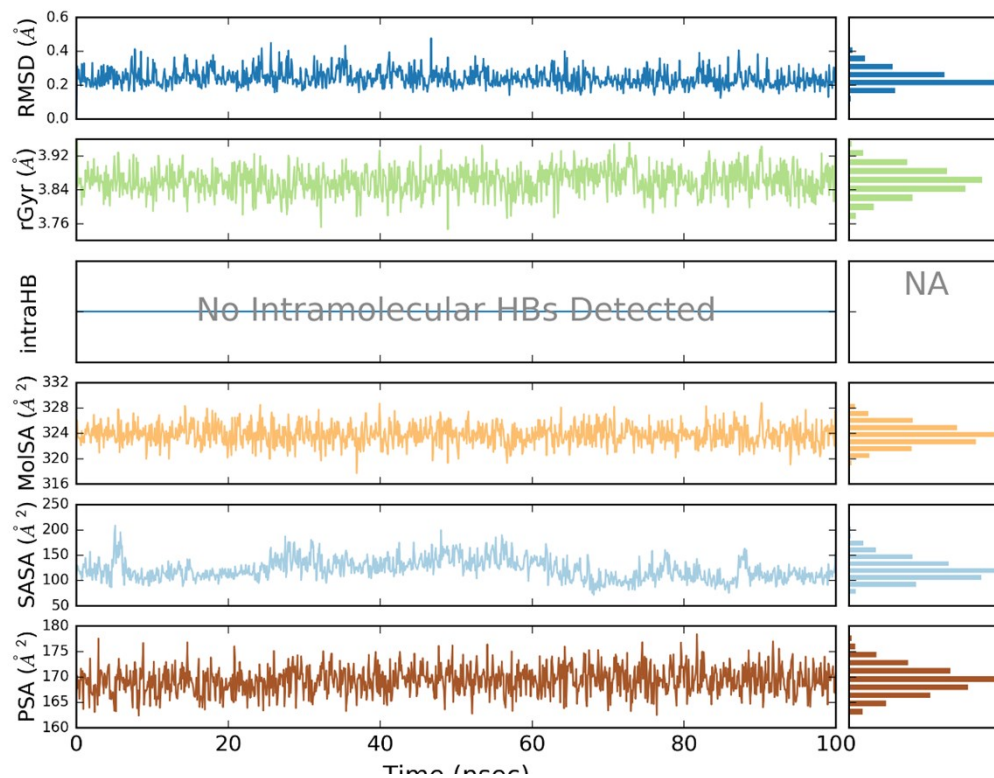

Figure 3: The ligand property trajectory of the Betamethasone-6LU7 complex during the 100 ns simulation

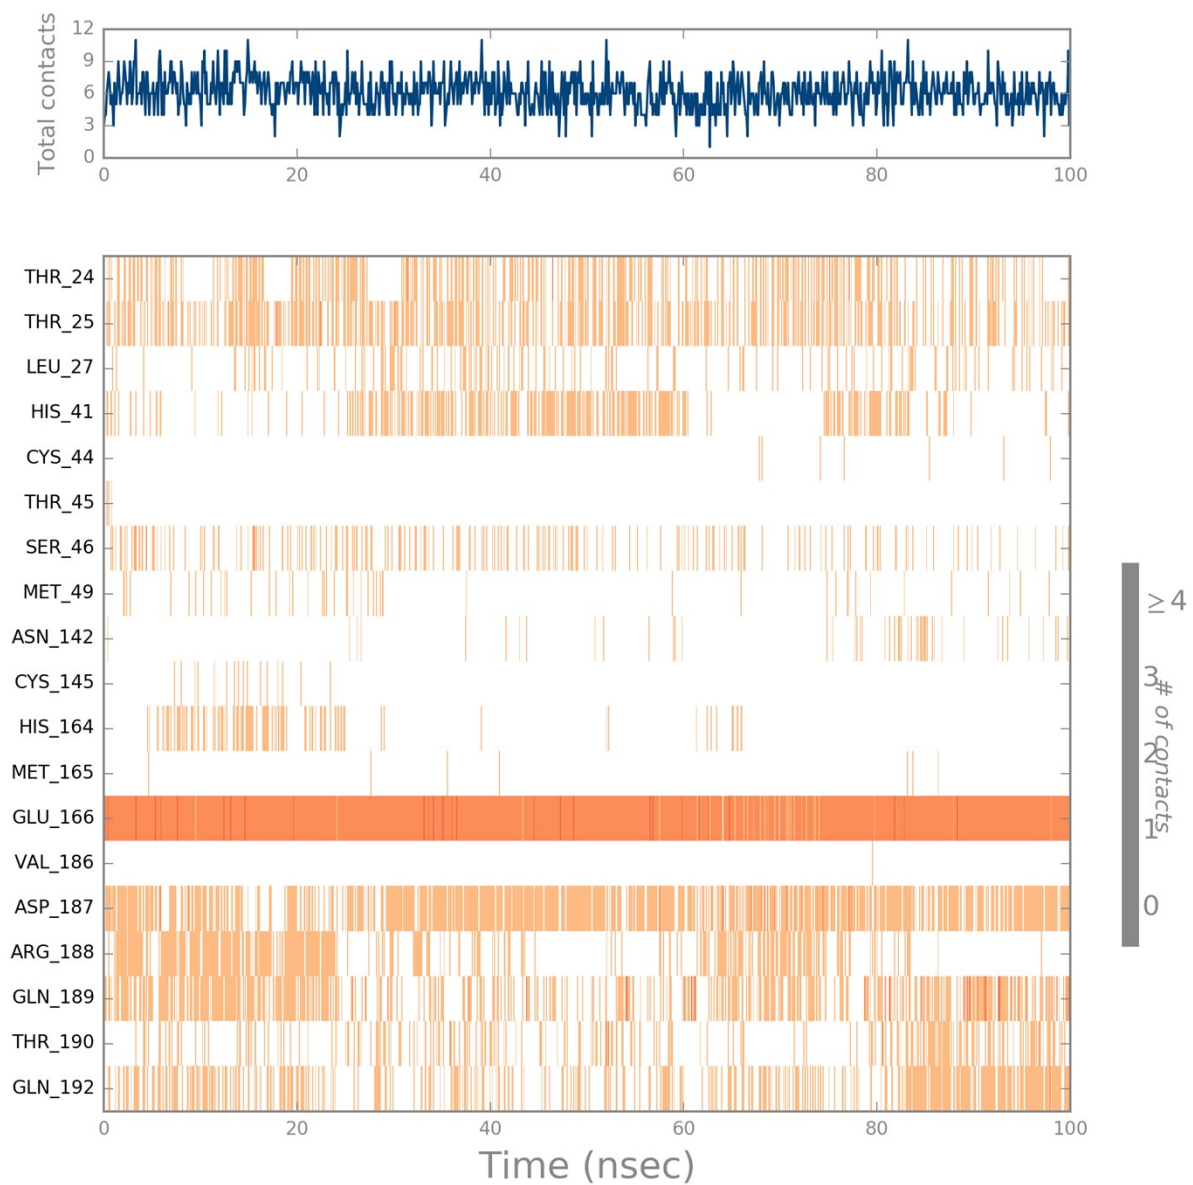

Figure 4: Betamethasone - 6LU7 Interaction shown by the active site amino acids in each trajectory frame, white refers to zero interaction while the deep color indicated more interactions.

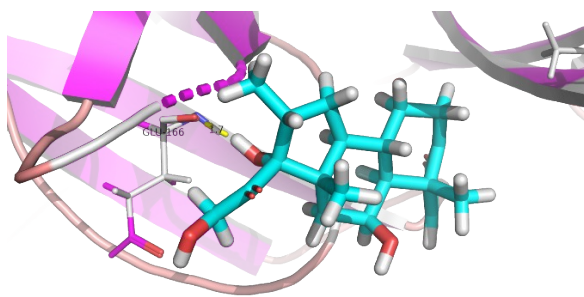

**0 ns**

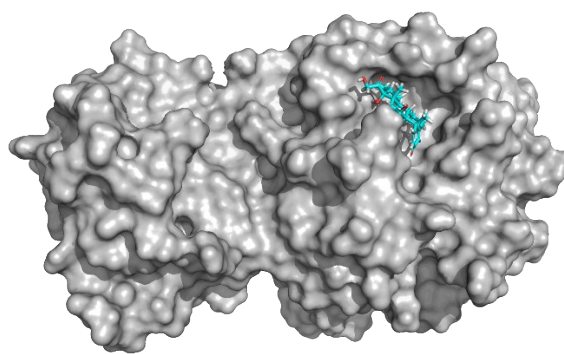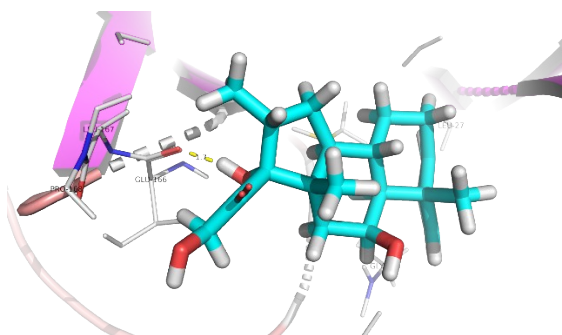

**50 ns**

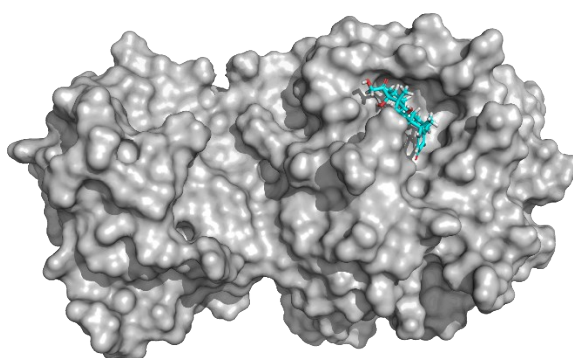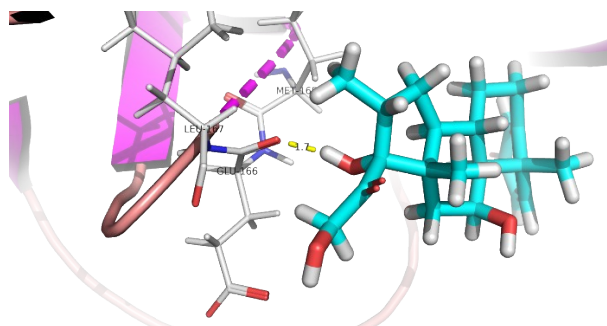

**100 ns**

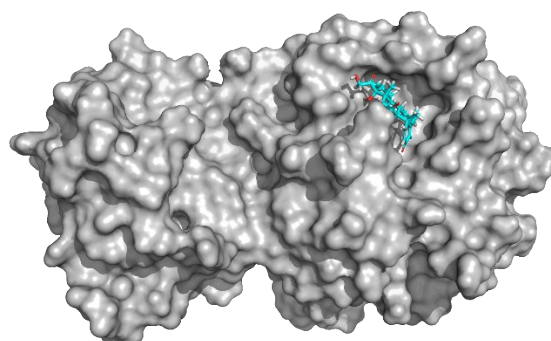

Figure 5: Snapshots of dexamethasone contact with active site at 0, 50, 100 ns.

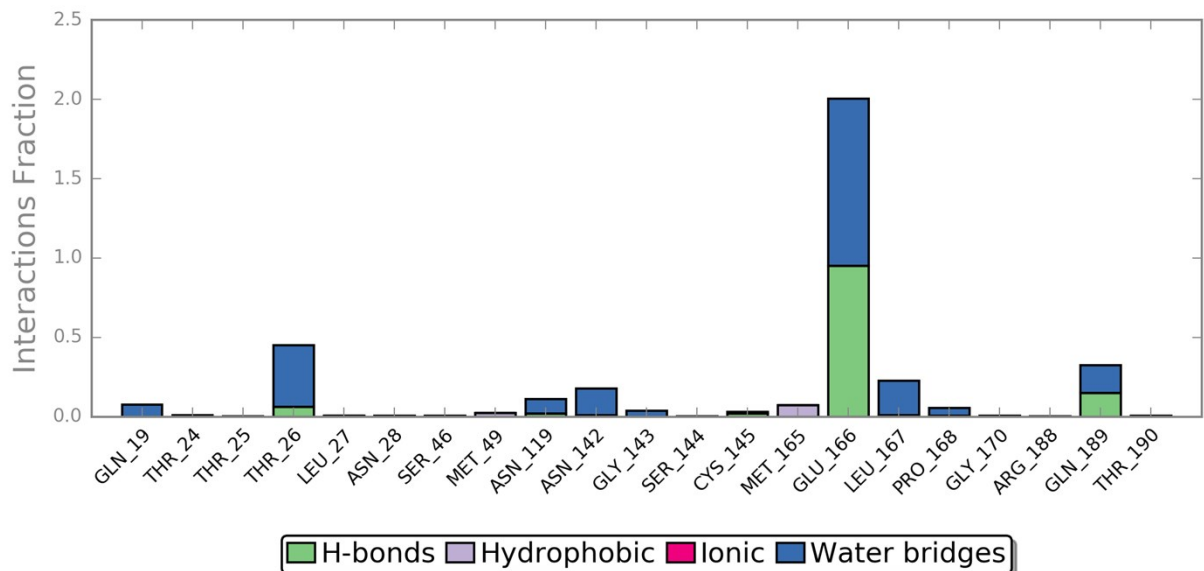

Figure 6 The histogram of Dexamethasone-6LU7 contact over the course of the trajectory.

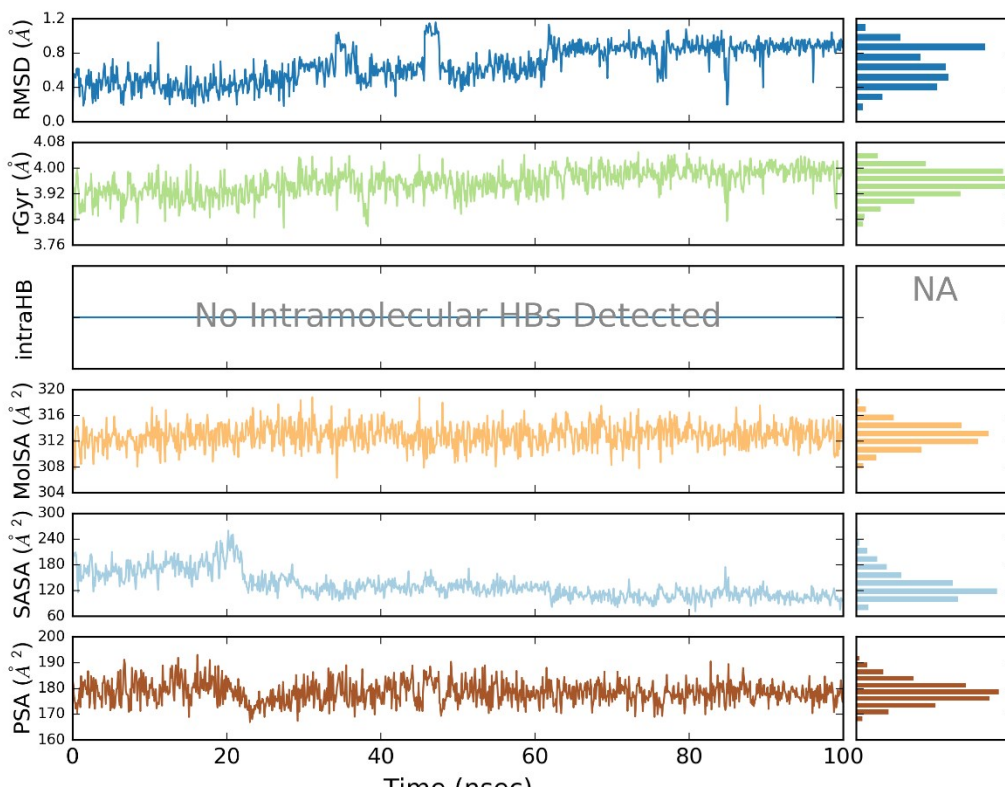

Figure 7: The ligand property trajectory of the dexamethasone-6LU7 complex during the 100 ns simulation

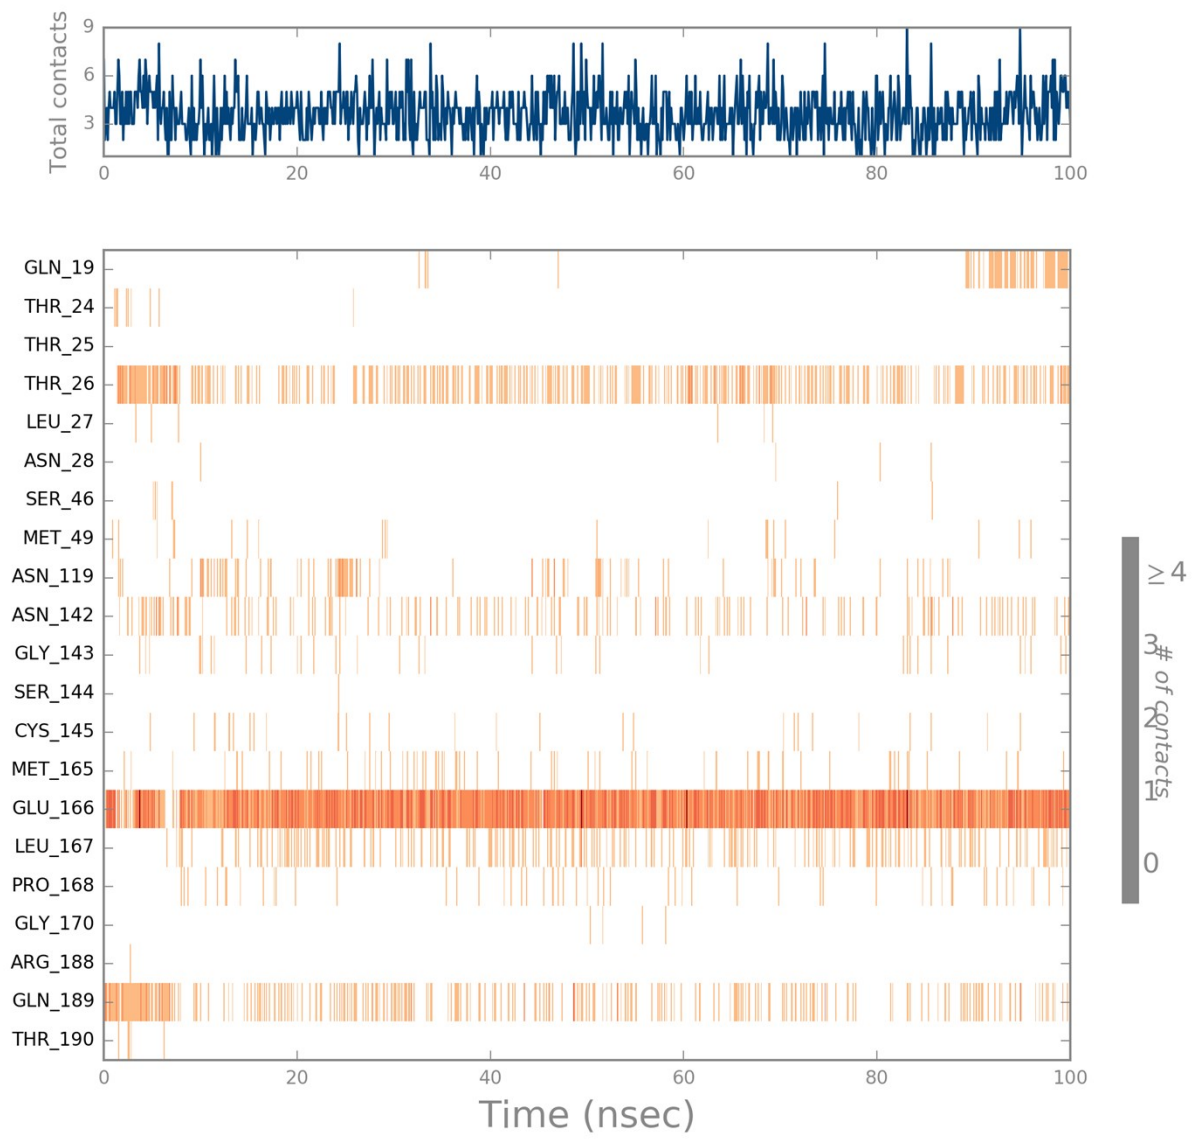

Figure 8: Dexamethasone - 6LU7 Interaction shown by the active site amino acids in each trajectory frame, white refers to zero interaction while the deep color indicated more interactions.



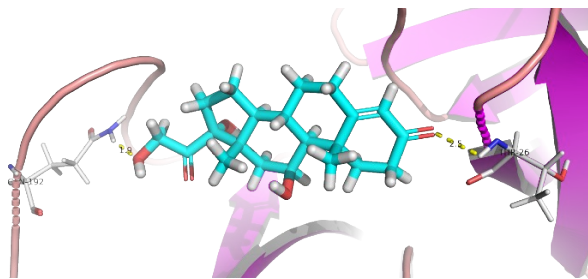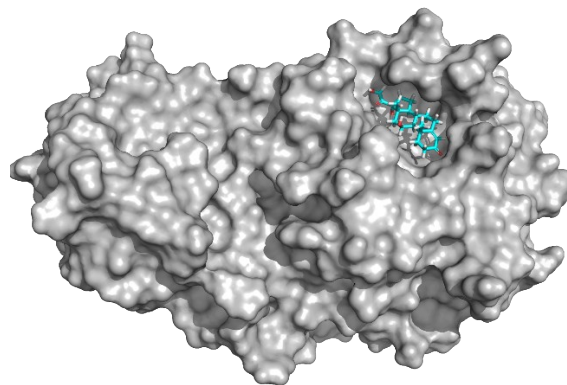

**0 ns**

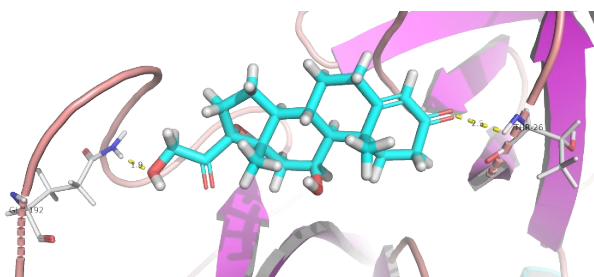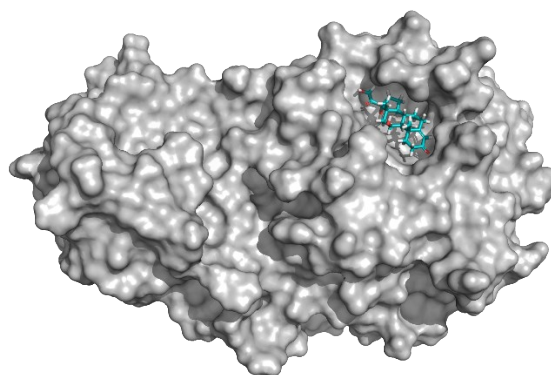

**50 ns**

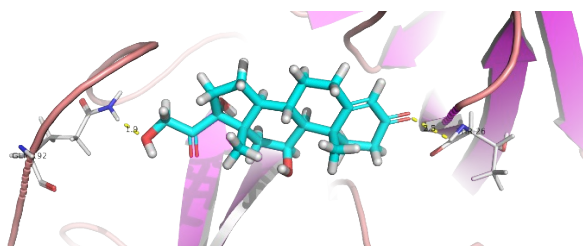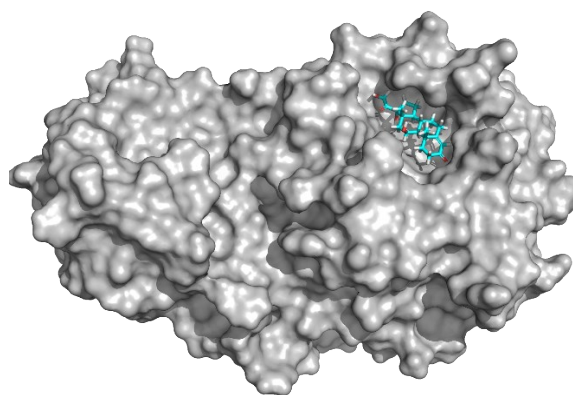

**100 ns**

Figure 9: Snapshots of hydrocortisone contact with active site at 0, 50, 100ns.

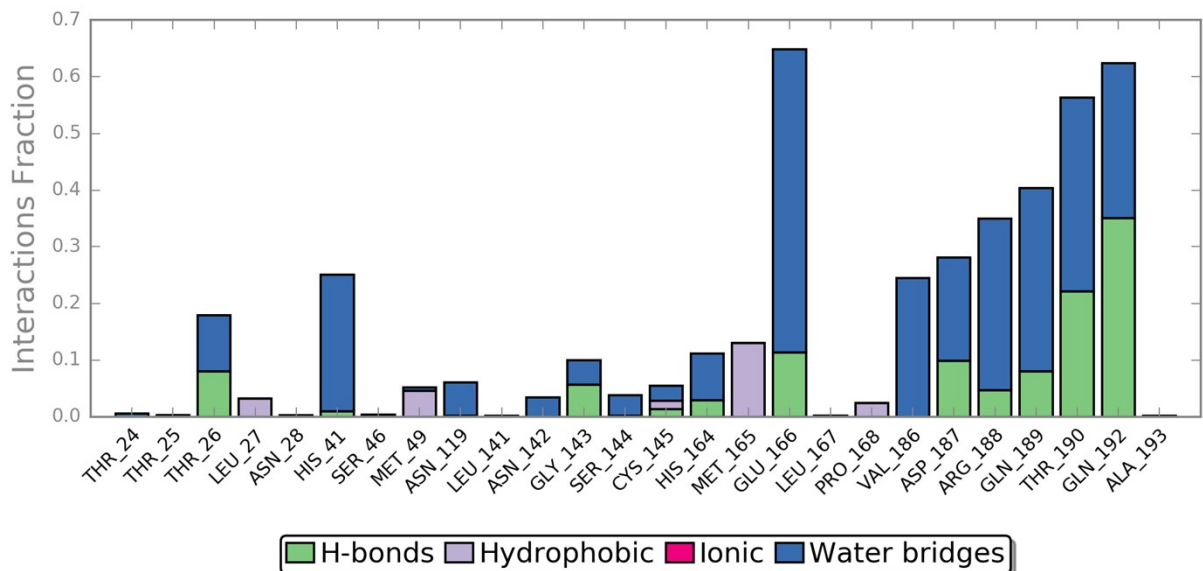

Figure 10: The histogram of hydrocortisone-6LU7 contact over the course of the trajectory.

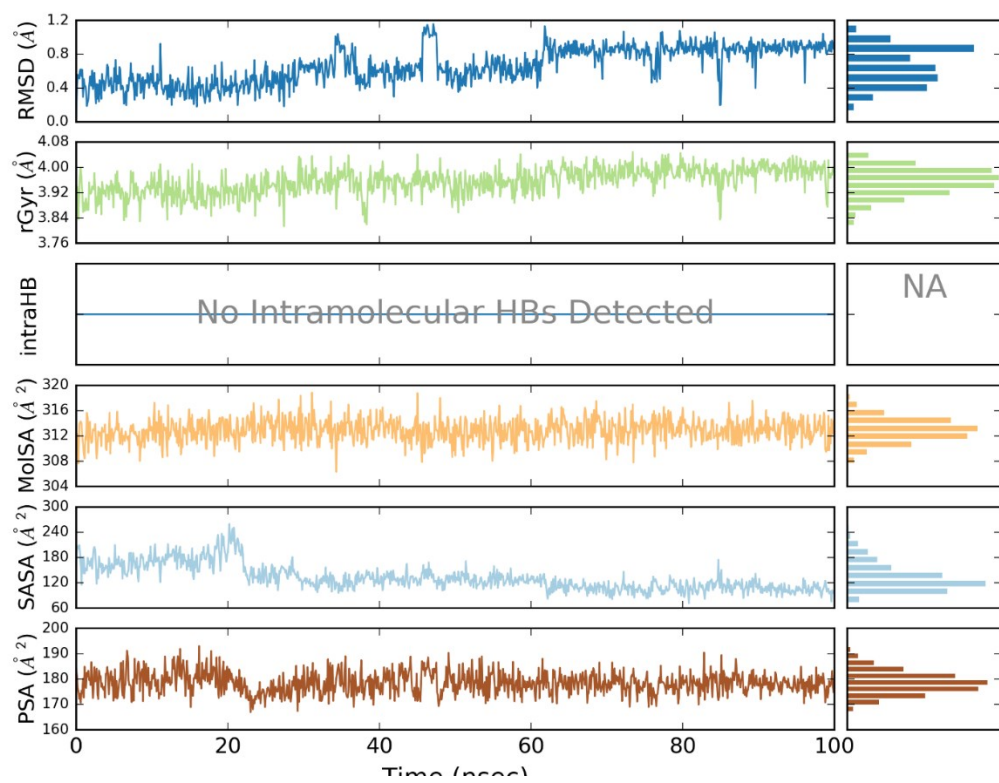

Figure 11: The ligand property trajectory of the hydrocortisone-6LU7 complex during the 100 ns simulation

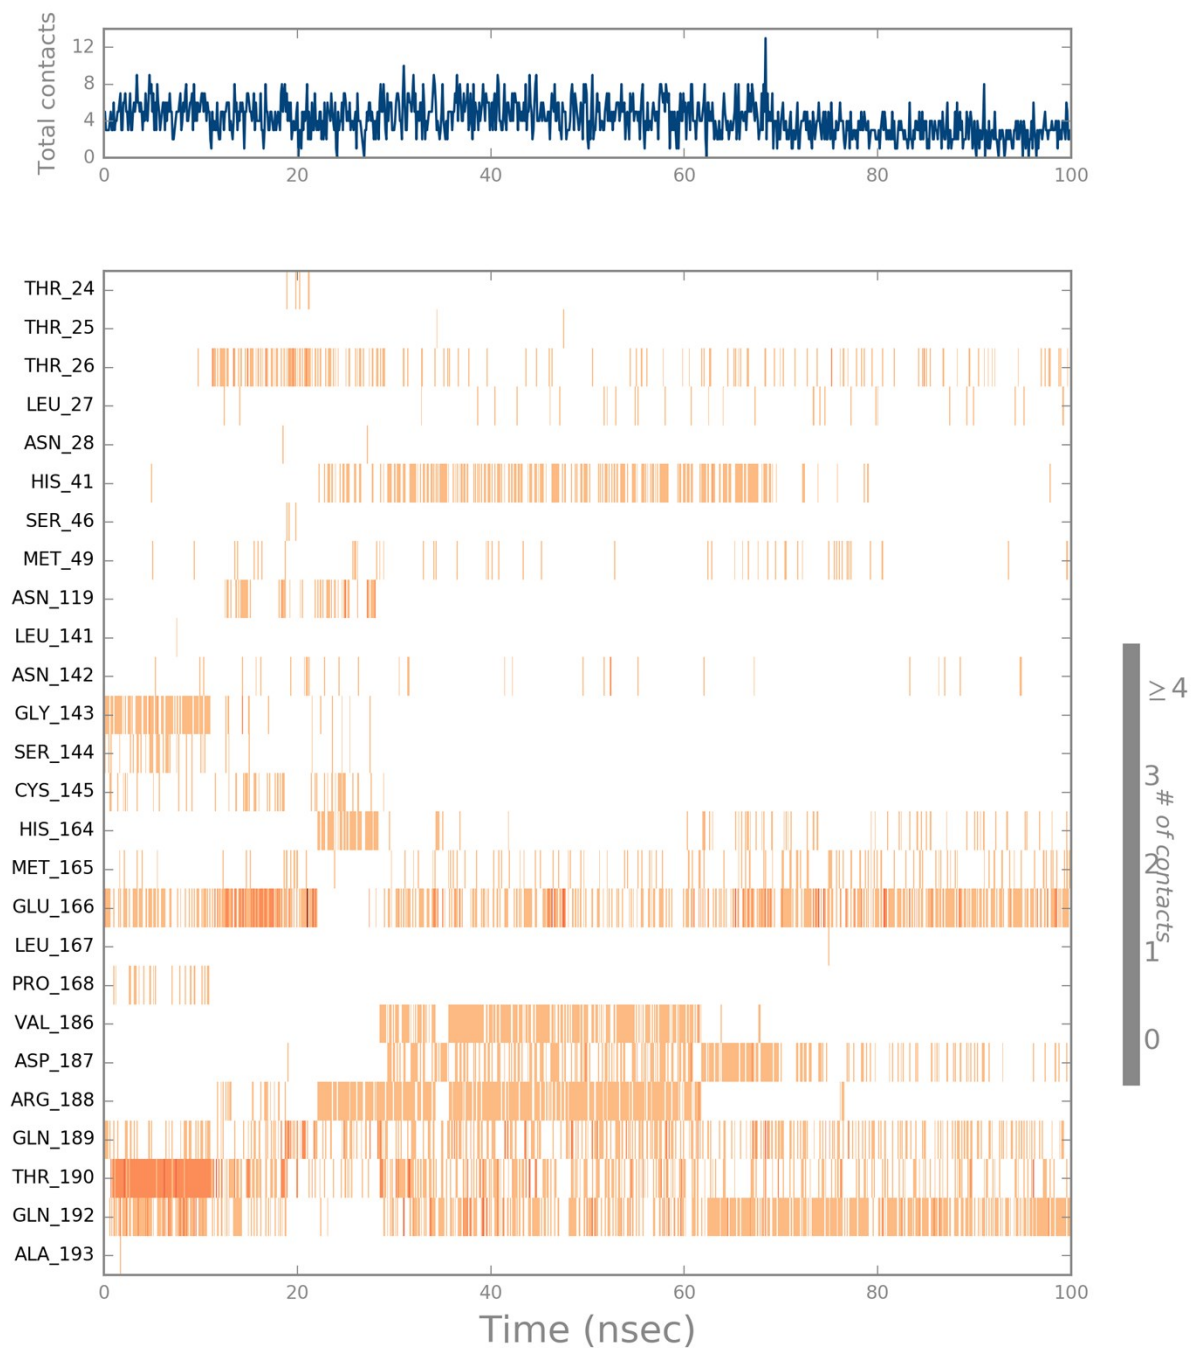

Figure 12: Hydrocortisone - 6LU7 Interaction shown by the active site amino acids in each trajectory frame, white refers to zero interaction while the deep color indicated more interactions.

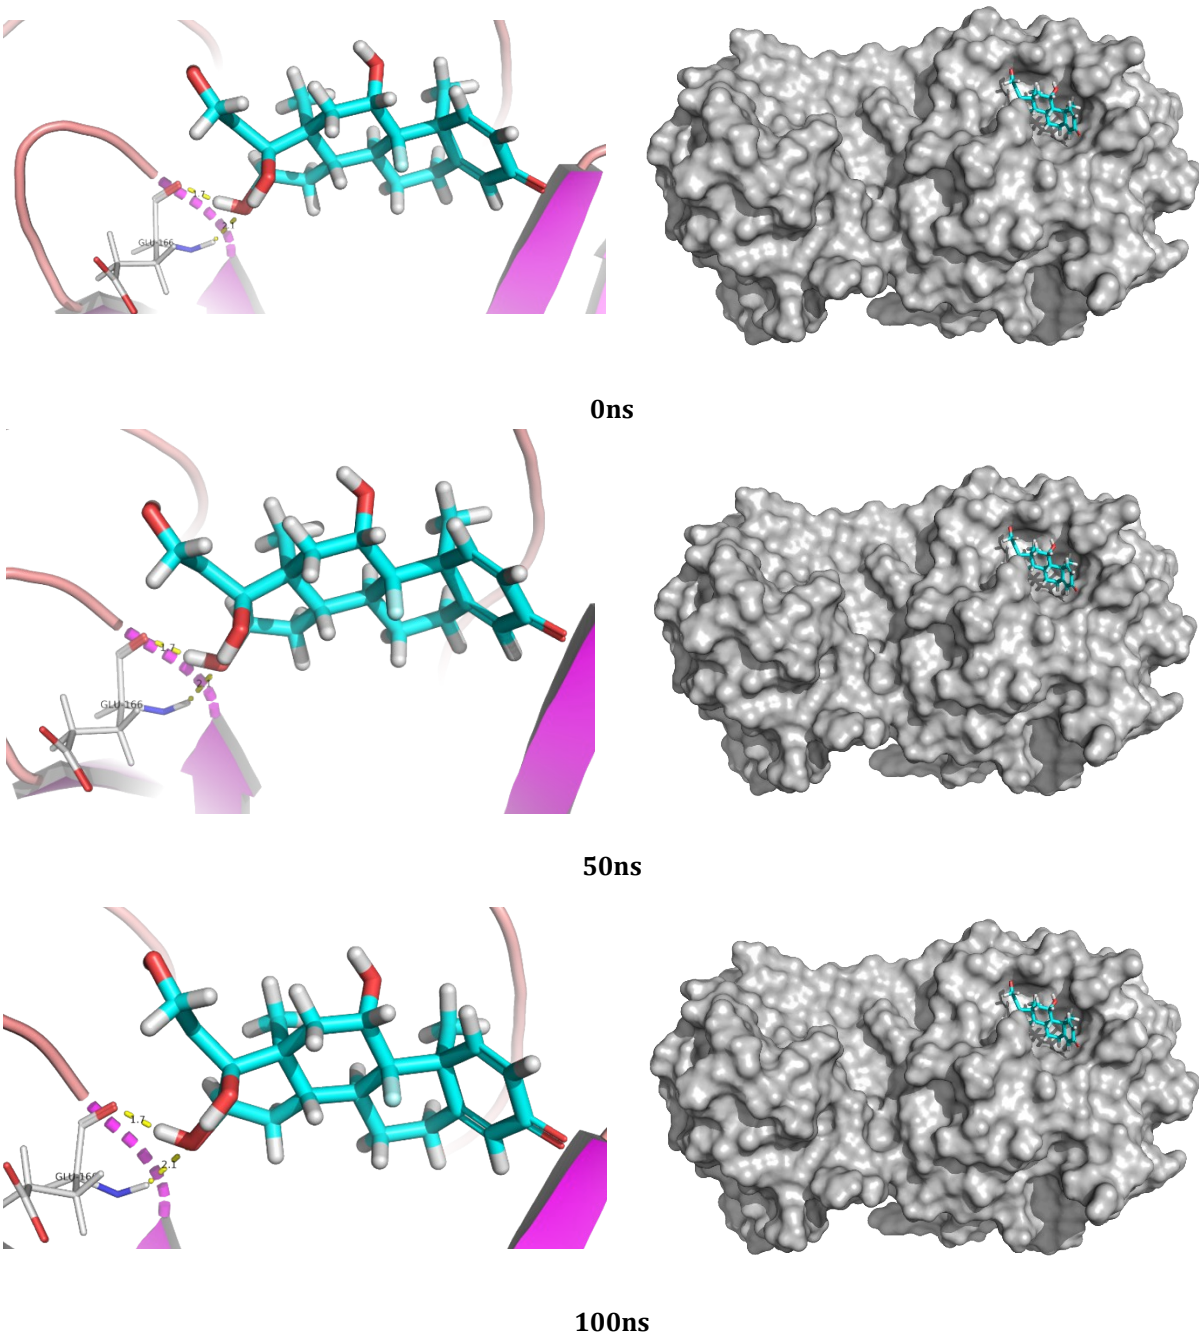

Figure 13: Snapshots of triamcinolone contact with active site at 0, 50, 100ns.

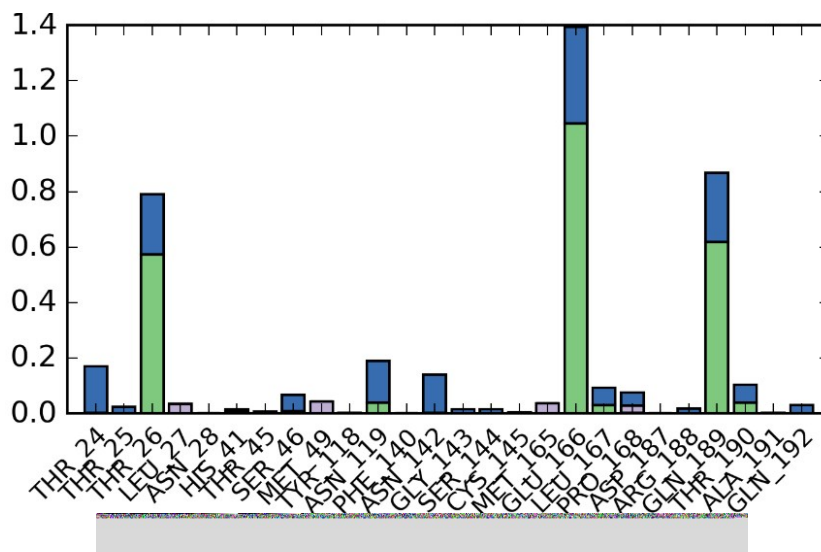

Figure 14: The histogram of triamcinolone-6LU7 contact over the course of the trajectory.

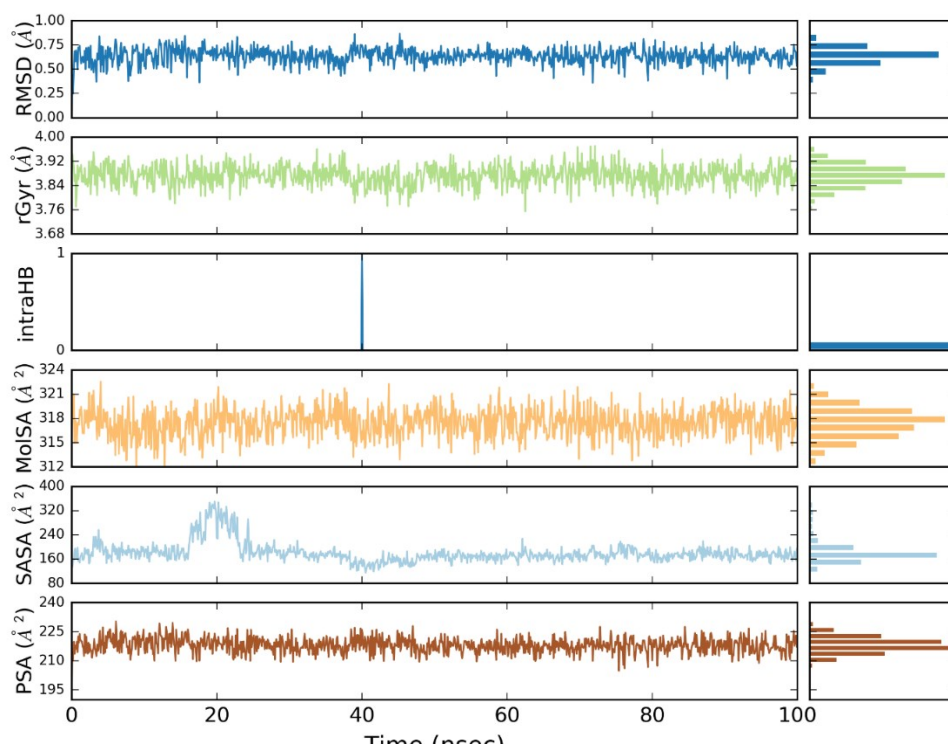

Figure 15: The ligand property trajectory of the triamcinolone-6LU7 complex during the 100 ns simulation

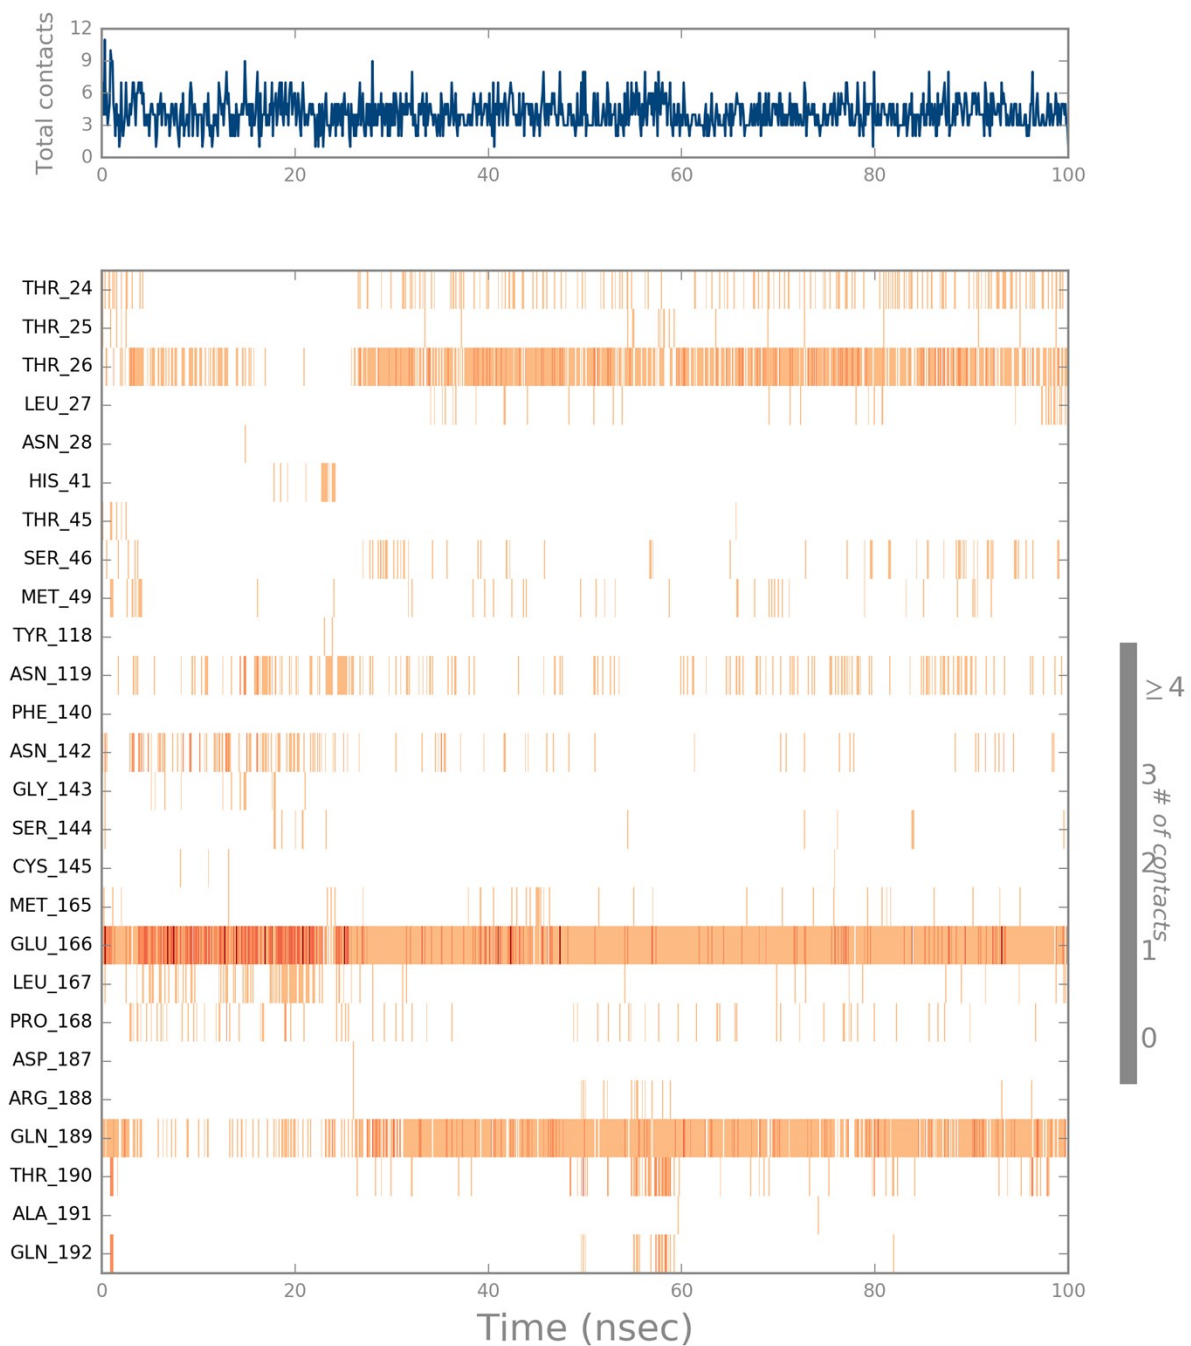

Figure 16: Triamcinolone - 6LU7 Interaction shown by the active site amino acids in each trajectory frame, white refers to zero interaction while the deep color indicated more interactions.

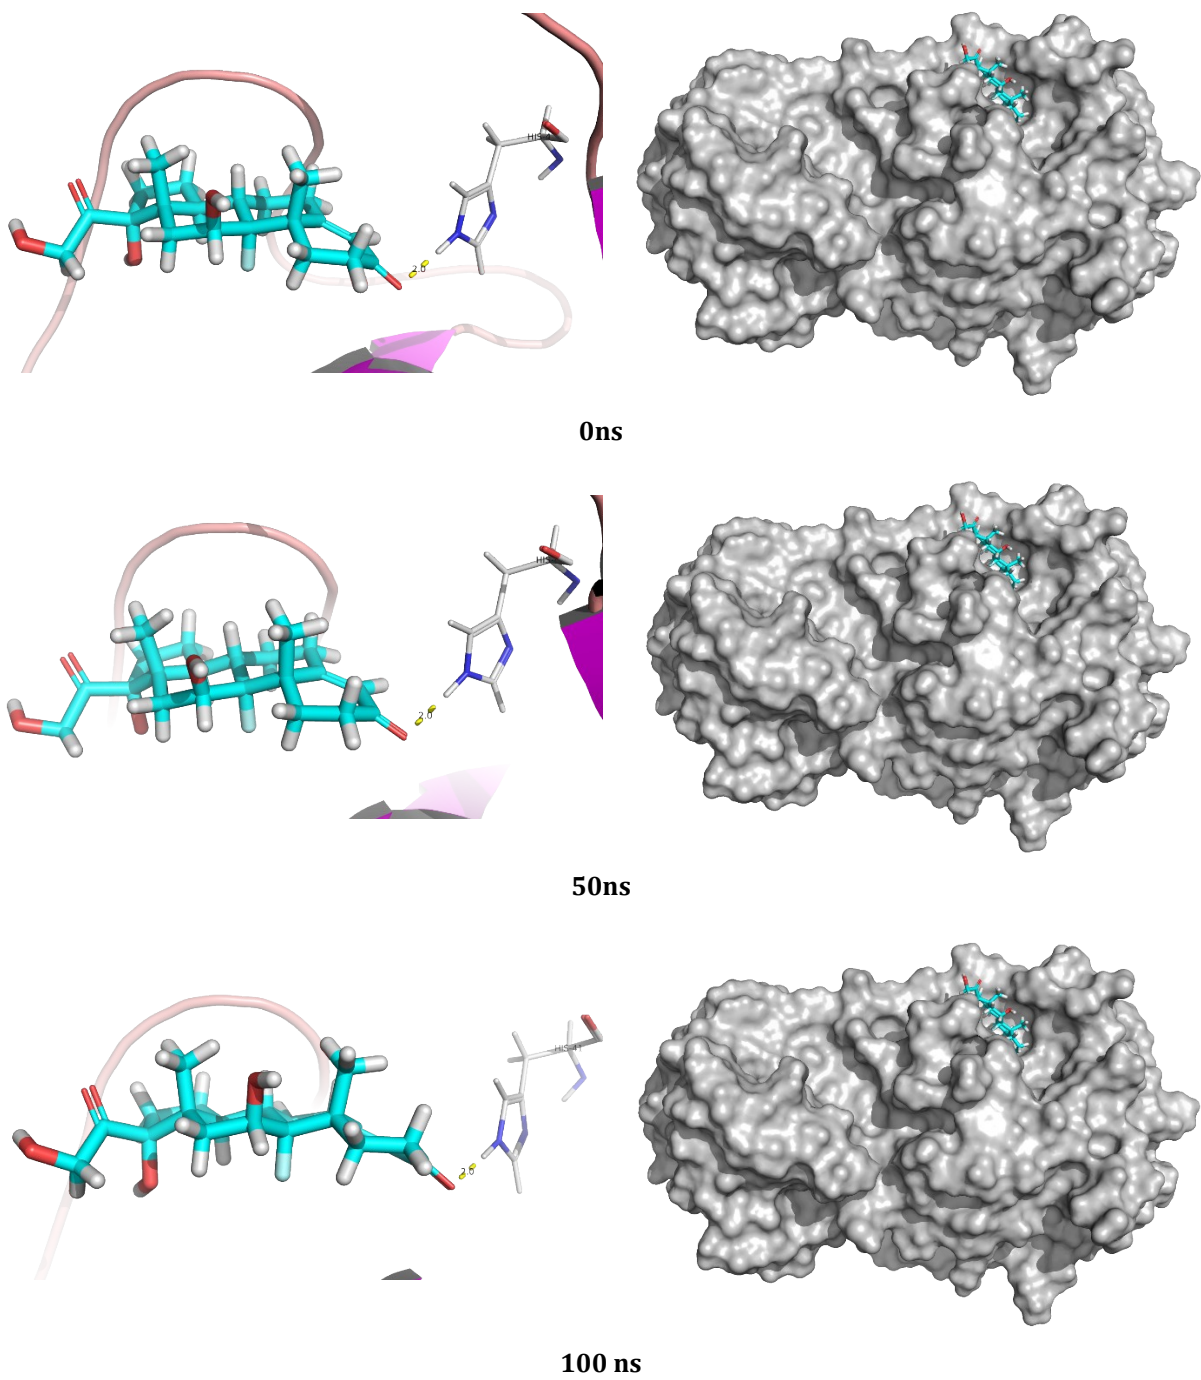

Figure 17: Snapshots of fludrocortisone contact with active site at 0, 50, 100ns.

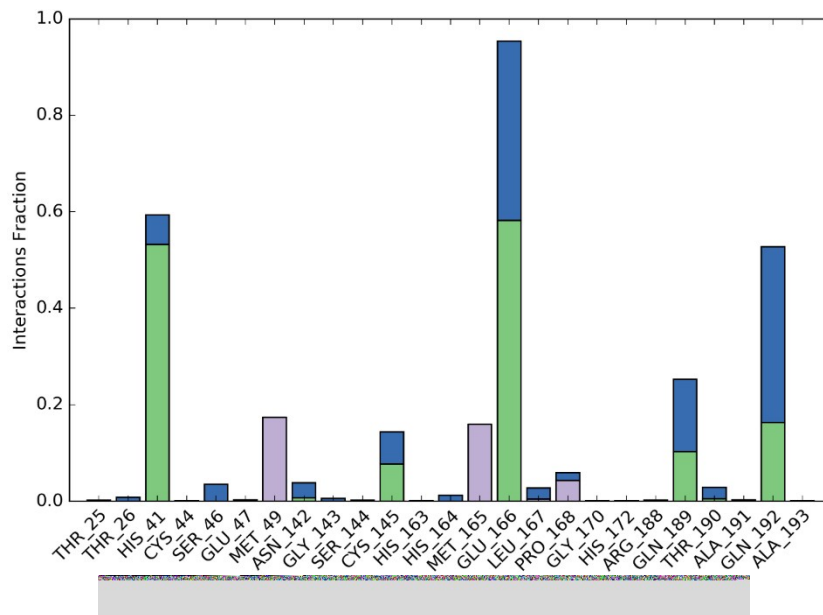

Figure 18: The histogram of fludrocortisone-6LU7 contact over the course of the trajectory.

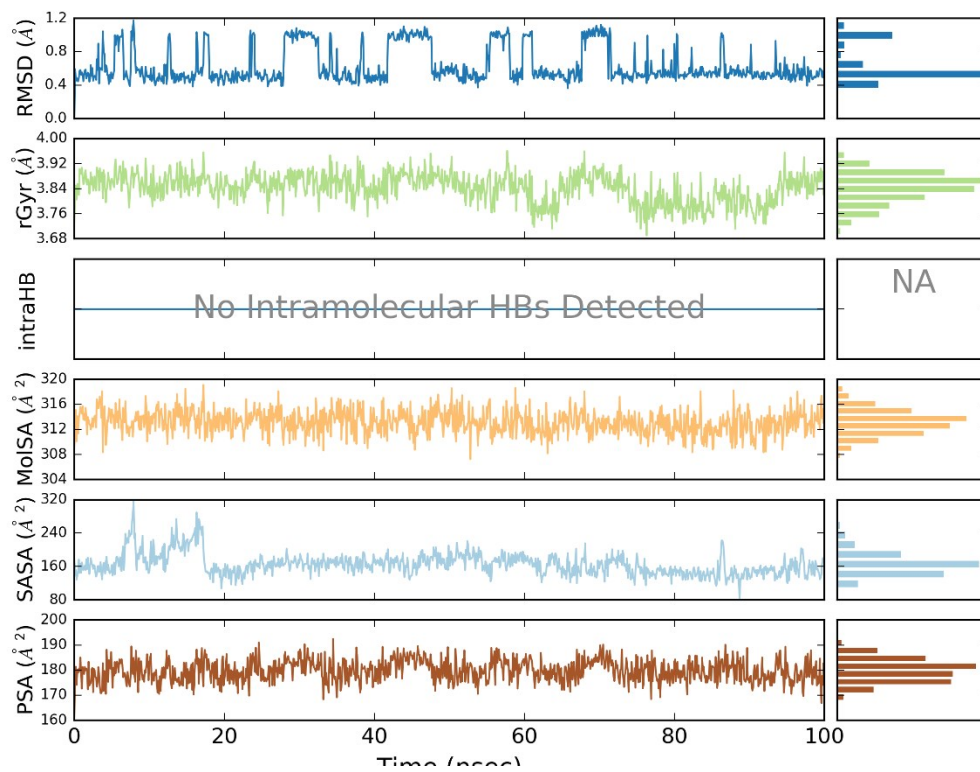

Figure 19: The ligand property trajectory of the fludrocortisone-6LU7 complex during the 100 ns simulation.



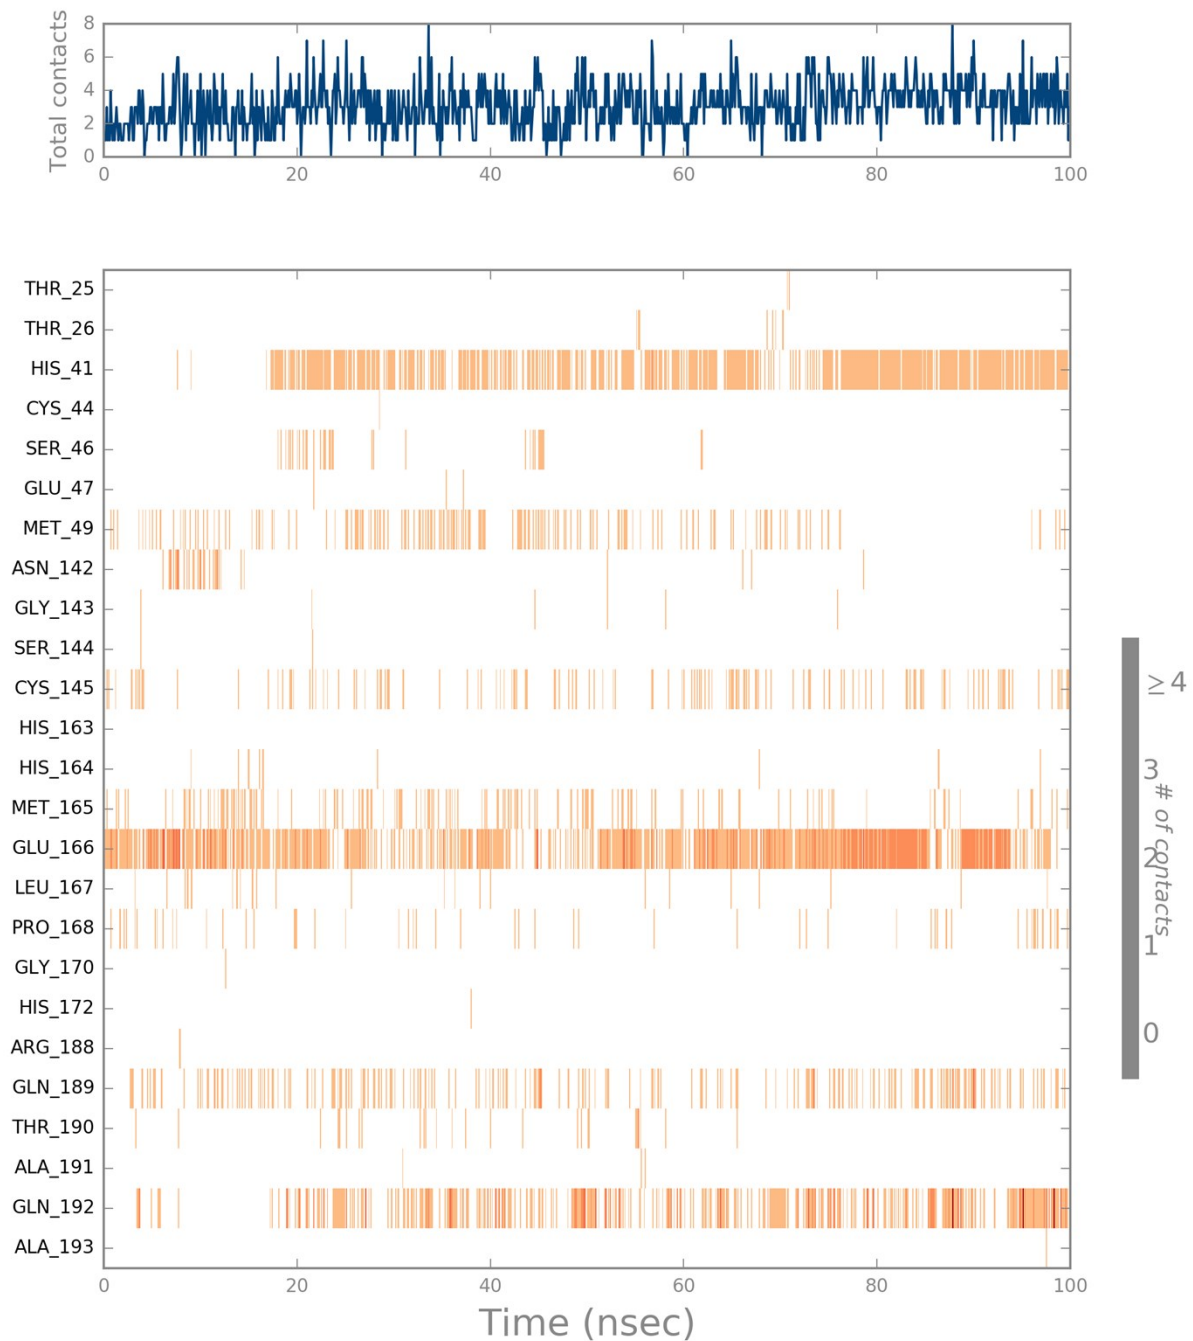

Figure 20: Fludrocortisone - 6LU7 Interaction shown by the active site amino acids in each trajectory frame, white refers to zero interaction while the deep color indicated more interactions.

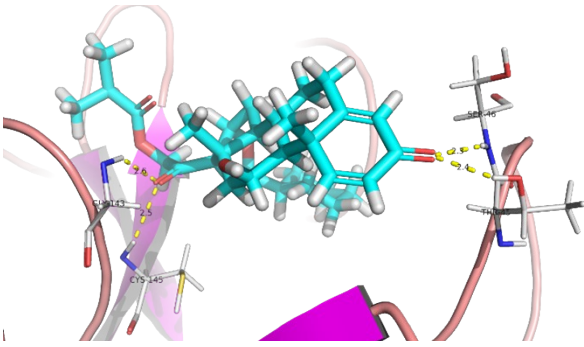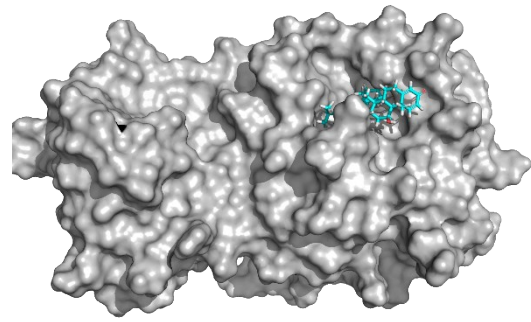

0 ns

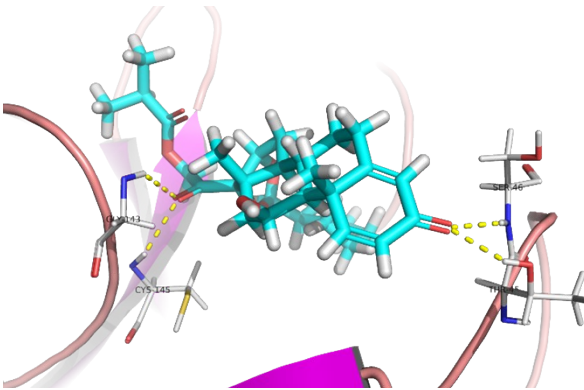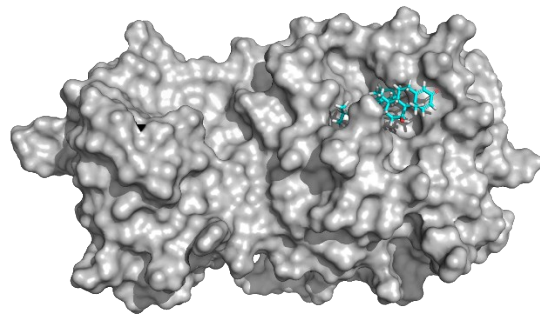

50 ns

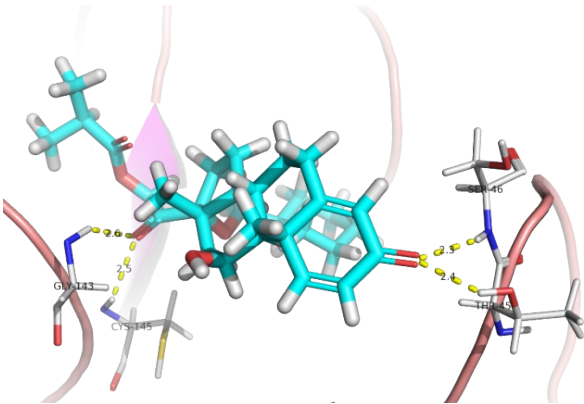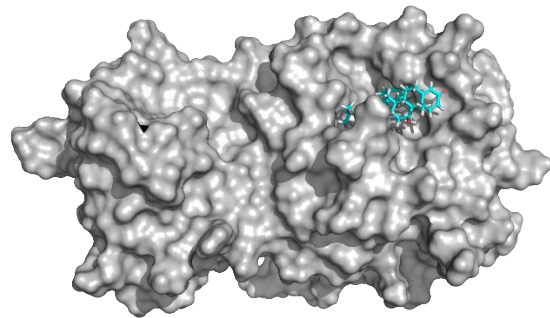

100 ns

Figure 21: Snapshots of ciclesonide contact with active site at 0, 50, 100ns.

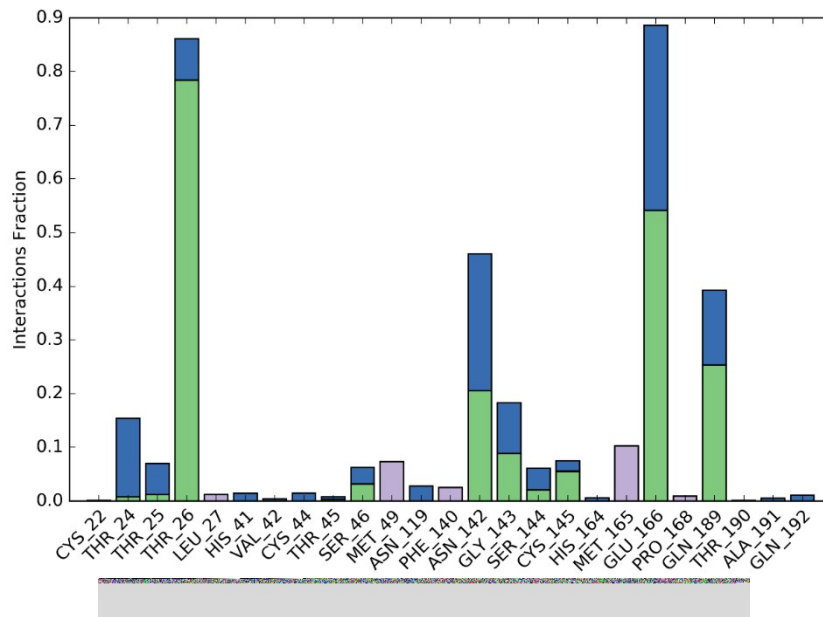

Figure 22: The histogram of ciclesonide-6LU7 contact over the course of the trajectory.

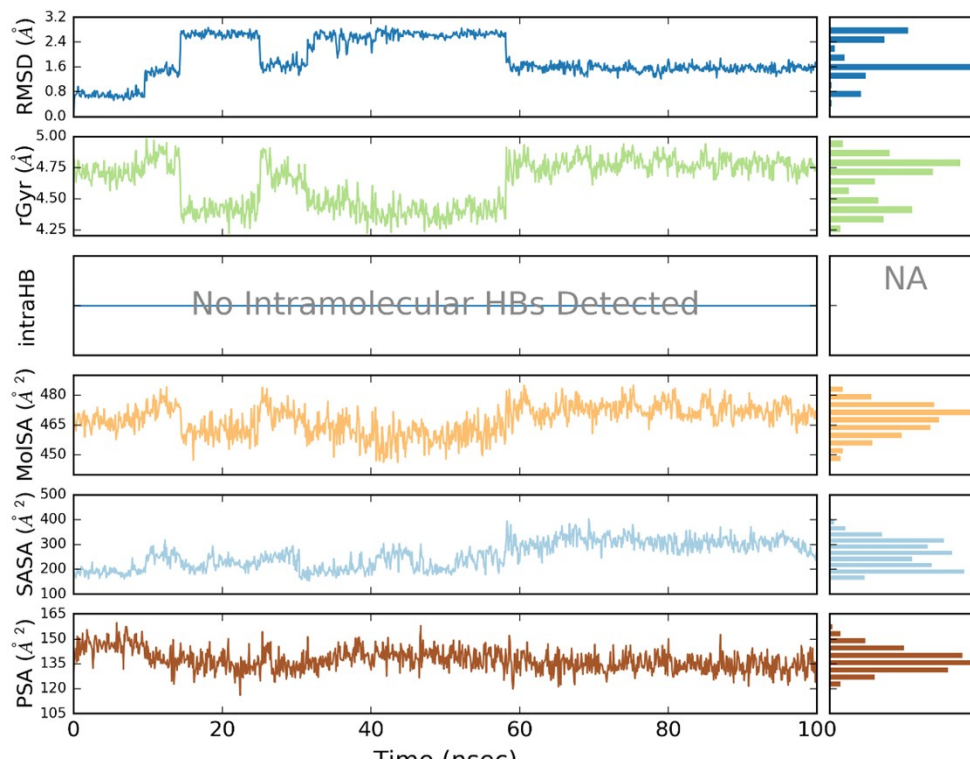

Figure 23: The ligand property trajectory of the ciclesonide-6LU7 complex during the 100 ns simulation

**Figure 24: 3 D docking representations of Glucocorticosteroids and N3 inhibitor against the binding site of the Covid-19 main protease.**

| No. | Glucocorticosteroids | 3D                                                                                   |
|-----|----------------------|--------------------------------------------------------------------------------------|
| 1   | Betamethasone        | 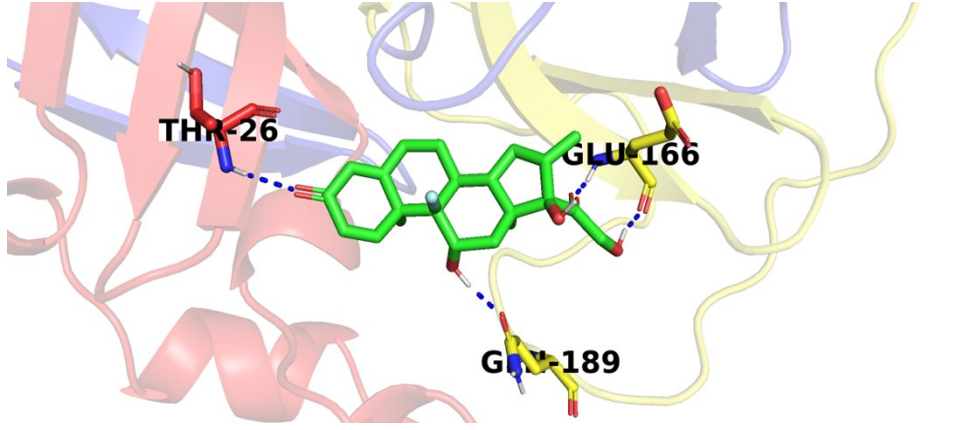   |
| 2   | Dexamethasone        |   |
| 3   | Fludrocortisone      |  |

|   |                    |                                                                                      |
|---|--------------------|--------------------------------------------------------------------------------------|
| 4 | Hydrocortisone     | 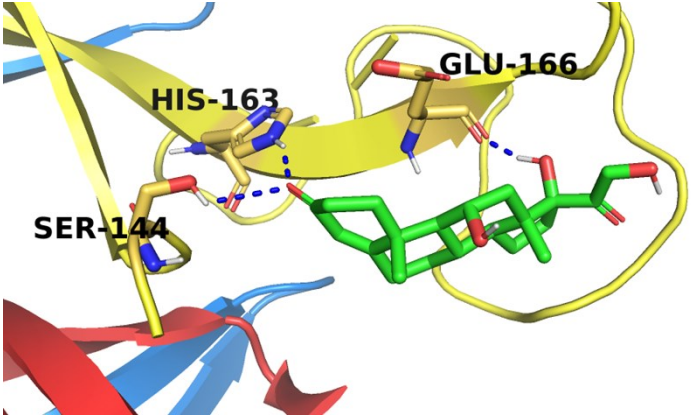   |
| 5 | Methylprednisolone |   |
| 6 | Prednisone         |  |

|   |                             |                                                                                      |
|---|-----------------------------|--------------------------------------------------------------------------------------|
| 7 | prednisolone                | 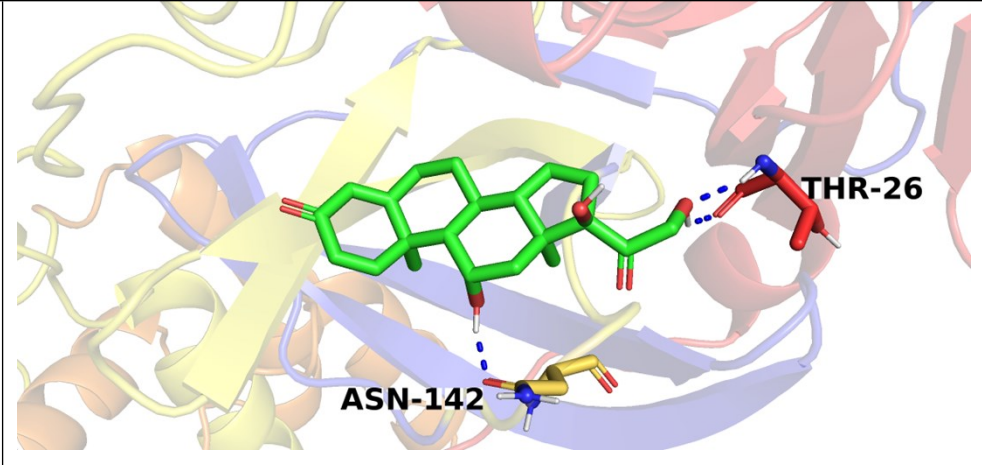   |
| 8 | Triamcinolone               |   |
| 9 | Beclomethasone dipropionate |  |

|    |                       |                                                                                      |
|----|-----------------------|--------------------------------------------------------------------------------------|
| 10 | Budesonide            | 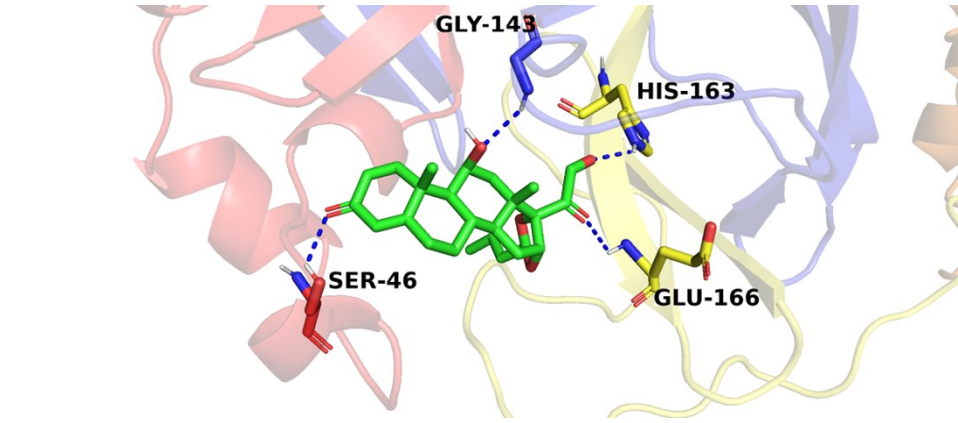   |
| 11 | Ciclesonide           |   |
| 12 | Clobetasol propionate |  |

|    |                        |                                                                                      |
|----|------------------------|--------------------------------------------------------------------------------------|
| 13 | Flunisolide            | 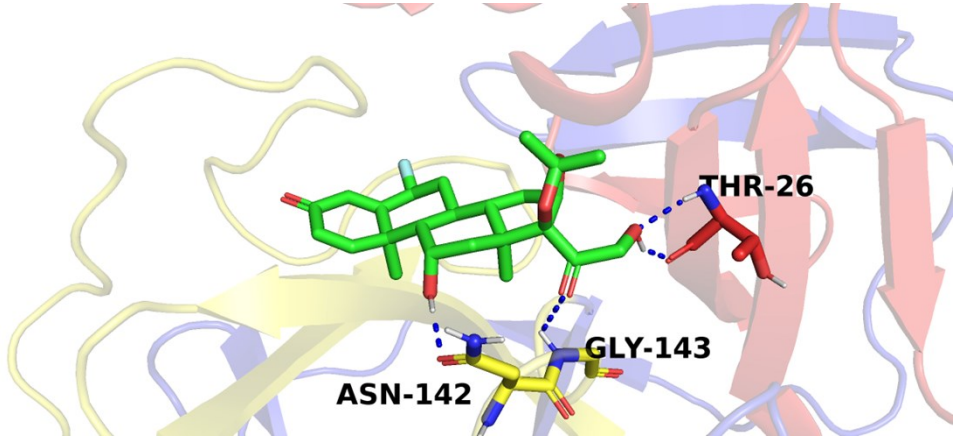   |
| 14 | Fluocinolone acetonide |   |
| 15 | Fluocinonide           |  |



|    |                        |                                                                                                                   |
|----|------------------------|-------------------------------------------------------------------------------------------------------------------|
| 16 | Fluorometholone        | 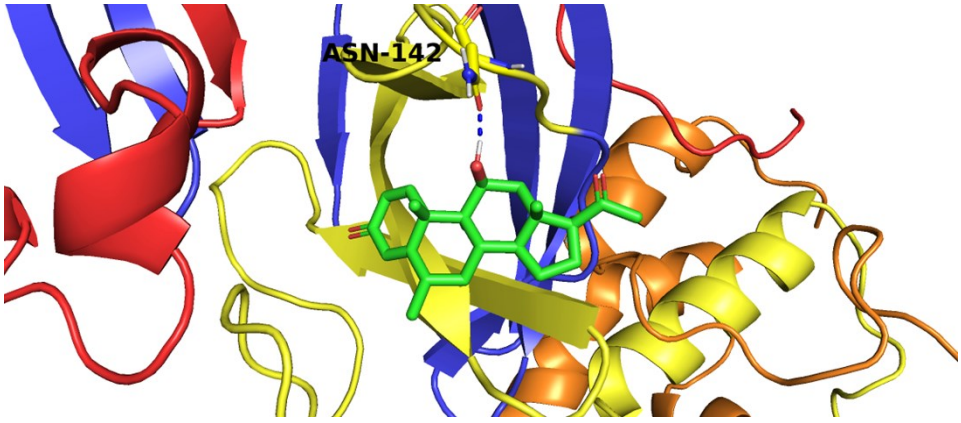 <p>ASN-142</p>                 |
| 17 | Flurandrenolide        |  <p>HIS-164</p> <p>GLN-189</p> |
| 18 | Fluticasone propionate |  <p>HIS-41</p> <p>GLN-189</p> |

|    |                        |                                                                                      |
|----|------------------------|--------------------------------------------------------------------------------------|
| 19 | Halcinonide            | 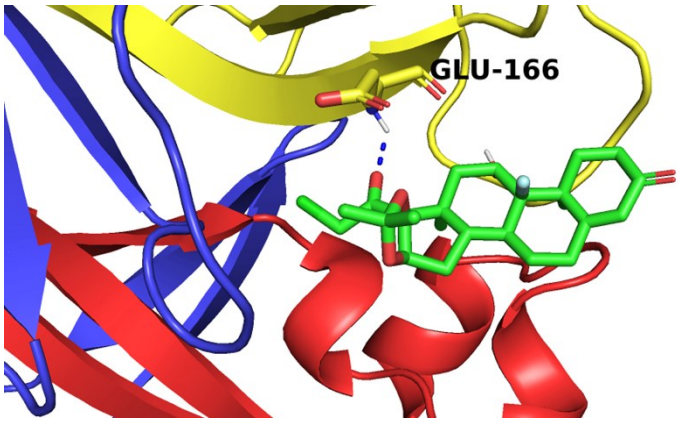   |
| 20 | Halobetasol propionate |   |
| 21 | Mometasone furoate     |  |

|    |                             |                                                                                     |
|----|-----------------------------|-------------------------------------------------------------------------------------|
| 22 | Triamcinolone<br>acetoneide | 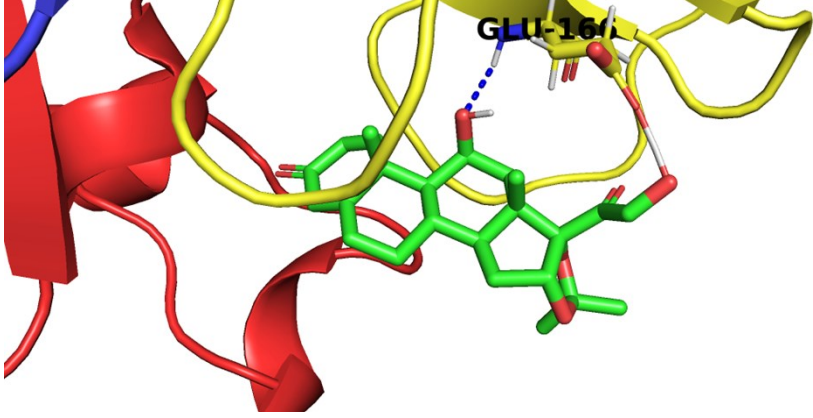  |
| 23 | N3                          |  |

Figure 25: A) Surface of M<sup>pro</sup> showing the positioning and fitting of the selected compounds, B) surface and maps of the selected compounds compared to N3 inhibitor.

| No. | Glucocorticosteroids | A                                                                                    | B                                                                                     |
|-----|----------------------|--------------------------------------------------------------------------------------|---------------------------------------------------------------------------------------|
| 1   | Betamethasone        | 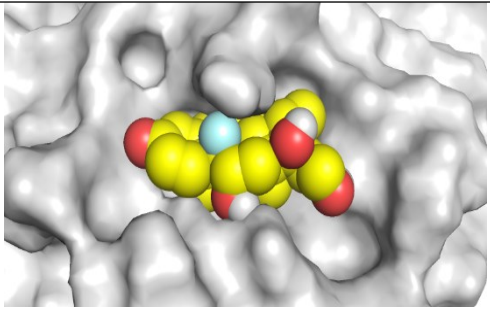   |    |
| 2   | Dexamethasone        |    |    |
| 3   | Fludrocortisone      |  |  |
| 4   | Hydrocortisone       |  |  |

|   |                                    |                                                                                      |                                                                                       |
|---|------------------------------------|--------------------------------------------------------------------------------------|---------------------------------------------------------------------------------------|
| 5 | <b>Methylprednisolone</b>          | 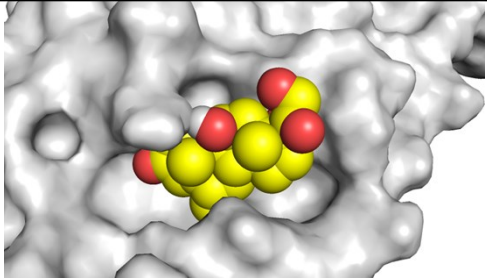   |    |
| 6 | <b>Prednisone</b>                  |    |    |
| 7 | <b>prednisolone</b>                |   |   |
| 8 | <b>Triamcinolone</b>               |  |  |
| 9 | <b>Beclomethasone dipropionate</b> |  |  |

|    |                               |                                                                                      |                                                                                       |
|----|-------------------------------|--------------------------------------------------------------------------------------|---------------------------------------------------------------------------------------|
| 10 | <b>Budesonide</b>             | 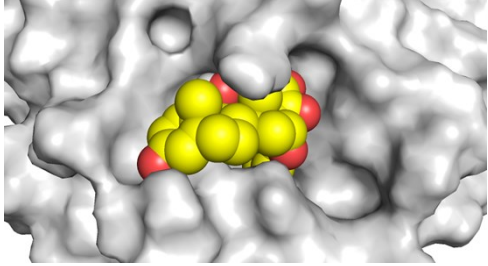   |    |
| 11 | <b>Ciclesonide</b>            |    |    |
| 12 | <b>Clobetasol propionate</b>  |   |   |
| 13 | <b>Flunisolide</b>            |  |  |
| 14 | <b>Fluocinolone acetonide</b> |  |  |

|    |                               |                                                                                      |                                                                                       |
|----|-------------------------------|--------------------------------------------------------------------------------------|---------------------------------------------------------------------------------------|
| 15 | <b>Fluocinonide</b>           | 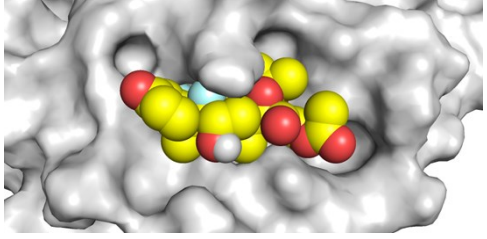   |    |
| 16 | <b>Fluorometholone</b>        |    |    |
| 17 | <b>Flurandrenolide</b>        |   |   |
| 18 | <b>Fluticasone propionate</b> |  |  |
| 19 | <b>Halcinonide</b>            |  |  |

|    |                         |                                                                                      |                                                                                       |
|----|-------------------------|--------------------------------------------------------------------------------------|---------------------------------------------------------------------------------------|
| 20 | Halobetasol propionate  | 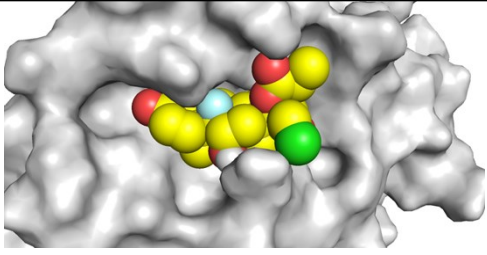   |    |
| 21 | Mometasone furoate      |    |    |
| 22 | Triamcinolone acetonide |   |   |
| 23 | N3                      |  |  |

Figure 26: 2 D diagram (a) and 3 D representation (b) of the superimposition of the co-crystallized (red) and the docking pose (green) of N3 in the Covid-19 main protease binding site with RMSD of 1.23 Å.

(a)

(b)



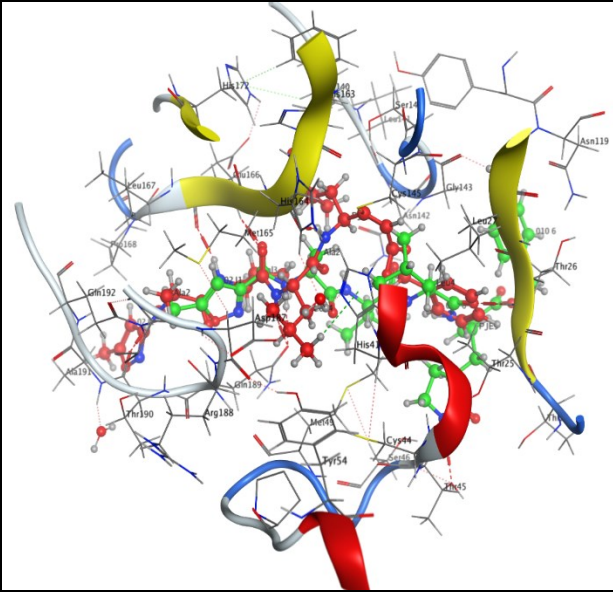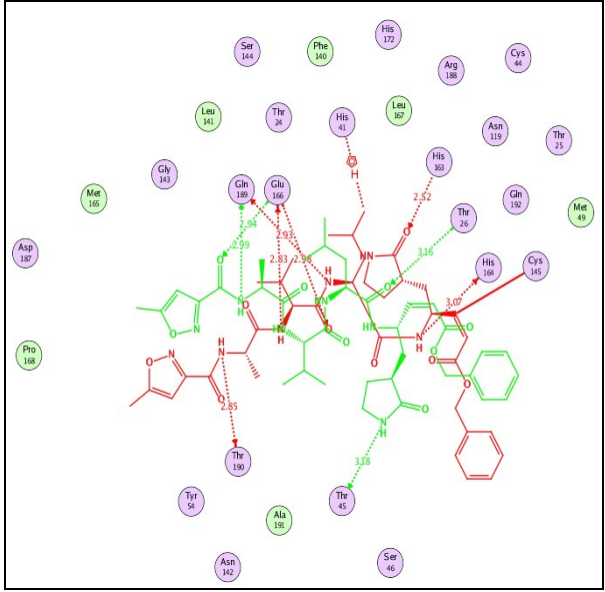

Supplement: d0ra10674g1.pdf [file d0ra10674g1.pdf]
